# Supplementary material for: Analysis of Under-Diagnosed Malignancy during Fine Needle Aspiration Cytology of Lymphadenopathies
Source: MDPI journal article supplement (doi:10.3390/ijms241512394), 2023-08-03
Supplement: s1 [file s1]

**Table S1.** 94 up-regulated genes.

|    | <b>Genes</b> | <b>Identifier</b> | <b>Description</b>                                            |
|----|--------------|-------------------|---------------------------------------------------------------|
| 1  | FOS          | NM_005252         | Fos proto-oncogene, AP-1 transcription factor subunit         |
| 2  | CLNS1A       | NM_001293         | chloride nucleotide-sensitive channel 1A                      |
| 3  | PMPCB        | NM_004279         | peptidase, mitochondrial processing beta subunit              |
| 4  | GHITM        | NM_014394         | growth hormone inducible transmembrane protein                |
| 5  | HDAC10       | NM_032019         | histone deacetylase 10                                        |
| 6  | RASA4B       | NM_001277335      | RAS p21 protein activator 4B                                  |
| 7  | PPAT         | NM_002703         | phosphoribosyl pyrophosphate amidotransferase                 |
| 8  | OSBPL10      | NM_001174060      | oxysterol binding protein like 10                             |
| 9  | CAMLG        | NM_001745         | calcium modulating ligand                                     |
| 10 | RHOB         | NM_004040         | ras homolog family member B                                   |
| 11 | CKAP2        | NM_001098525      | cytoskeleton associated protein 2                             |
| 12 | TUSC2        | NM_007275         | tumor suppressor candidate 2                                  |
| 13 | GLUD1P3      | NR_048575         | glutamate dehydrogenase 1 pseudogene 3                        |
| 14 | HPS5         | NM_007216         | HPS5, biogenesis of lysosomal organelles complex 2 subunit 2  |
| 15 | AP3S1        | NM_001284         | adaptor related protein complex 3 sigma 1 subunit             |
| 16 | PPIP5K1      | NM_014659         | diphosphoinositol pentakisphosphate kinase 1                  |
| 17 | C2orf69      | NM_153689         | chromosome 2 open reading frame 69                            |
| 18 | OSER1        | NM_016470         | oxidative stress responsive serine rich 1                     |
| 19 | DRAM1        | NM_018370         | DNA damage regulated autophagy modulator 1                    |
| 20 | ENDOG        | NM_004435         | endonuclease G                                                |
| 21 | PRKAR2B      | NM_002736         | protein kinase cAMP-dependent type II regulatory subunit beta |
| 22 | FAM159A      | NM_001042693      | family with sequence similarity 159 member A                  |
| 23 | TRIP10       | NR_110231         | thyroid hormone receptor interactor 10                        |
| 24 | TTC4         | NM_004623         | tetratricopeptide repeat domain 4                             |
| 25 | FPR1         | NM_001193306      | formyl peptide receptor 1                                     |
| 26 | SAAL1        | NM_138421         | serum amyloid A like 1                                        |
| 27 | N6AMT2       | NM_174928         | EEF1AKMT1, EEF1A Lysine Methyltransferase 1                   |
| 28 | TMEM167A     | NM_174909         | transmembrane protein 167A                                    |
| 29 | RAB28        | NM_001159601      | RAB28, member RAS oncogene family                             |
| 30 | ZNF664       | NM_001204298      | zinc finger protein 664                                       |
| 31 | FAM189B      | NM_198264         | family with sequence similarity 189 member B                  |

|    |           |              |                                                                                |
|----|-----------|--------------|--------------------------------------------------------------------------------|
| 32 | SUCLG2    | NM_001177599 | succinate-CoA ligase GDP-forming beta subunit                                  |
| 33 | LOC155060 | NR_036573    | AI894139 pseudogene                                                            |
| 34 | CD163     | NM_203416    | CD163 molecule                                                                 |
| 35 | TICAM1    | NM_182919    | toll like receptor adaptor molecule 1                                          |
| 36 | G0S2      | NM_015714    | G0 /G1 switch 2                                                                |
| 37 | NCAPD3    | NM_015261    | non-SMC condensin II complex subunit D3                                        |
| 38 | LINC01138 | NR_104014    | long intergenic non-protein coding RNA 1138                                    |
| 39 | HMMR      | NM_001142556 | hyaluronan mediated motility receptor                                          |
| 40 | DCK       | NM_000788    | deoxycytidine kinase                                                           |
| 41 | LINC00623 | NR_024511    | long intergenic non-protein coding RNA 623                                     |
| 42 | PPP6R2    | NM_001242900 | protein phosphatase 6 regulatory subunit 2                                     |
| 43 | C9orf114  | NM_016390    | chromosome 9 open reading frame 114                                            |
| 44 | MRPS10    | NM_018141    | mitochondrial ribosomal protein S10                                            |
| 45 | LINC-PINT | NR_110473    | long intergenic non-protein coding RNA, p53 induced transcript                 |
| 46 | LOC374443 | NR_046450    | C-type lectin domain family 2 member D pseudogene                              |
| 47 | RP9       | NM_203288    | retinitis pigmentosa 9 (autosomal dominant)                                    |
| 48 | LRRK1     | NM_024652    | leucine-rich repeat kinase 1                                                   |
| 49 | FABP4     | NM_001442    | fatty acid binding protein 4                                                   |
| 50 | ZDHHC16   | NM_032327    | zinc finger DHHC-type containing 16                                            |
| 51 | ATP5L2    | NM_001165877 | ATP synthase, H <sup>+</sup> transporting, mitochondrial Fo complex subunit G2 |
| 52 | DNASE1    | NM_005223    | deoxyribonuclease I                                                            |
| 53 | HSF1      | NM_005526    | heat shock transcription factor 1                                              |
| 54 | ICE2      | NM_001018089 | interactor of little elongation complex ELL subunit 2                          |
| 55 | PHB       | NM_001281497 | prohibitin                                                                     |
| 56 | PSMB4     | NM_002796    | proteasome subunit beta 4                                                      |
| 57 | SGK1      | NM_001291995 | serum /glucocorticoid regulated kinase 1                                       |
| 58 | LINC00869 | NR_111953    | long intergenic non-protein coding RNA 869                                     |
| 59 | MCOLN2    | NM_153259    | mucolipin 2                                                                    |
| 60 | LINC00106 | NR_130733    | long intergenic non-protein coding RNA 106                                     |
| 61 | ATP6V1B2  | NM_001693    | ATPase H <sup>+</sup> transporting V1 subunit B2                               |
| 62 | TRA2B     | NM_004593    | transformer 2 beta homolog (Drosophila)                                        |
| 63 | FILIP1L   | NM_001282794 | filamin A interacting protein 1-like                                           |
| 64 | EYA3      | NM_001282561 | EYA transcriptional coactivator and phosphatase 3                              |

|    |                   |              |                                                    |
|----|-------------------|--------------|----------------------------------------------------|
| 65 | RBM41             | NM_001171080 | RNA binding motif protein 41                       |
| 66 | BRPF1             | NM_004634    | bromodomain and PHD finger containing 1            |
| 67 | TSEN34            | NM_001282333 | tRNA splicing endonuclease subunit 34              |
| 68 | MEF2B             | NM_001145785 | myocyte enhancer factor 2B                         |
| 69 | TOR1A             | NM_000113    | torsin family 1 member A                           |
| 70 | PPP2R4            | NM_021131    | protein phosphatase 2A regulatory subunit 4        |
| 71 | ZSWIM6            | NM_020928    | zinc finger SWIM-type containing 6                 |
| 72 | ELOVL5            | NM_021814    | ELOVL fatty acid elongase 5                        |
| 73 | MEF2BNB-<br>MEF2B | NR_027307    | BORCS8-MEF2B, transcript variant 2, non-coding RNA |
| 74 | TBC1D22A          | NM_001284303 | TBC1 domain family member 22A                      |
| 75 | COA4              | NM_016565    | cytochrome c oxidase assembly factor 4 homolog     |
| 76 | TMEM64            | NM_001008495 | transmembrane protein 64                           |
| 77 | LSM1              | NR_045492    | LSM1 homolog, mRNA degradation associated          |
| 78 | BANF1             | NM_001143985 | barrier to autointegration factor 1                |
| 79 | MYB               | NM_005375    | MYB proto-oncogene, transcription factor           |
| 80 | IVNS1ABP          | NM_006469    | influenza virus NS1A binding protein               |
| 81 | NDUFA6            | NM_002490    | NADH:ubiquinone oxidoreductase subunit A6          |
| 82 | MRPS6             | NM_032476    | mitochondrial ribosomal protein S6                 |
| 83 | BAG1              | NM_001172415 | BCL2 associated athanogene 1                       |
| 84 | SMC1A             | NM_001281463 | structural maintenance of chromosomes 1A           |
| 85 | RFX7              | NM_022841    | regulatory factor X7                               |
| 86 | PTK2B             | NM_173174    | protein tyrosine kinase 2 beta                     |
| 87 | FBXL15            | NM_024326    | F-box and leucine-rich repeat protein 15           |
| 88 | CLHC1             | NM_152385    | clathrin heavy chain linker domain containing 1    |
| 89 | DAZAP1            | NM_170711    | DAZ associated protein 1                           |
| 90 | PPP1R12C          | NM_017607    | protein phosphatase 1 regulatory subunit 12C       |
| 91 | EIF4G1            | NM_198241    | eukaryotic translation initiation factor 4 gamma 1 |
| 92 | COX7A2L           | NM_004718    | cytochrome c oxidase subunit 7A2 like              |
| 93 | MRPL21            | NM_181514    | mitochondrial ribosomal protein L21                |
| 94 | PHOX2A            | NM_005169    | paired like homeobox 2a                            |

---
