# Supplementary material for: Analysis of Under-Diagnosed Malignancy during Fine Needle Aspiration Cytology of Lymphadenopathies
Source: MDPI journal article supplement (doi:10.3390/ijms241512394), 2023-08-03
Supplement: s1 [file s1]

**Table S3.** 65 candidate genes used in cBioPortal.

|    | <b>Genes</b> | <b>Identifier</b> | <b>Description</b>                                                                      |
|----|--------------|-------------------|-----------------------------------------------------------------------------------------|
| 1  | FOS          | NM_005252         | Fos proto-oncogene, AP-1 transcription factor subunit                                   |
| 2  | PMPCB        | NM_004279         | peptidase, mitochondrial processing beta subunit                                        |
| 3  | GHITM        | NM_014394         | growth hormone inducible transmembrane protein                                          |
| 4  | HDAC10       | NM_032019         | histone deacetylase 10                                                                  |
| 5  | RASA4B       | NM_001277335      | RAS p21 protein activator 4B                                                            |
| 6  | CAMLG        | NM_001745         | calcium modulating ligand                                                               |
| 7  | AP3S1        | NM_001284         | adaptor related protein complex 3 sigma 1 subunit                                       |
| 8  | PIIP5K1      | NM_014659         | diphosphoinositol pentakisphosphate kinase 1                                            |
| 9  | C2orf69      | NM_153689         | chromosome 2 open reading frame 69                                                      |
| 10 | ENDOG        | NM_004435         | endonuclease G                                                                          |
| 11 | PRKAR2B      | NM_002736         | protein kinase cAMP-dependent type II regulatory subunit beta                           |
| 12 | TRIP10       | NR_110231         | thyroid hormone receptor interactor 10                                                  |
| 13 | TTC4         | NM_004623         | tetratricopeptide repeat domain 4                                                       |
| 14 | FPR1         | NM_001193306      | formyl peptide receptor 1                                                               |
| 15 | N6AMT2       | NM_174928         | EEF1AKMT1, EEF1A Lysine Methyltransferase 1                                             |
| 16 | TMEM167A     | NM_174909         | transmembrane protein 167A                                                              |
| 17 | RAB28        | NM_001159601      | RAB28, member RAS oncogene family                                                       |
| 18 | FAM189B      | NM_198264         | family with sequence similarity 189 member B                                            |
| 19 | CD163        | NM_203416         | CD163 molecule                                                                          |
| 20 | TICAM1       | NM_182919         | toll like receptor adaptor molecule 1                                                   |
| 21 | G0S2         | NM_015714         | G0 /G1 switch 2                                                                         |
| 22 | NCAPD3       | NM_015261         | non-SMC condensin II complex subunit D3                                                 |
| 23 | LINC01138    | NR_104014         | long intergenic non-protein coding RNA 1138                                             |
| 24 | HMMR         | NM_001142556      | hyaluronan mediated motility receptor                                                   |
| 25 | LINC00623    | NR_024511         | long intergenic non-protein coding RNA 623                                              |
| 26 | PPP6R2       | NM_001242900      | protein phosphatase 6 regulatory subunit 2                                              |
| 27 | C9orf114     | NM_016390         | SPOUT1, chromosome 9 open reading frame 114                                             |
| 28 | MRPS10       | NM_018141         | mitochondrial ribosomal protein S10                                                     |
| 29 | LRRK1        | NM_024652         | leucine-rich repeat kinase 1                                                            |
| 30 | FABP4        | NM_001442         | fatty acid binding protein 4                                                            |
| 31 | ATP5L2       | NM_001165877      | ATP5MGL, ATP synthase, H <sup>+</sup> transporting, mitochondrial Fo complex subunit G2 |

|    |               |              |                                                    |
|----|---------------|--------------|----------------------------------------------------|
| 32 | DNASE1        | NM_005223    | deoxyribonuclease I                                |
| 33 | HSF1          | NM_005526    | heat shock transcription factor 1                  |
| 34 | PSMB4         | NM_002796    | proteasome subunit beta 4                          |
| 35 | SGK1          | NM_001291995 | serum /glucocorticoid regulated kinase 1           |
| 36 | LINC00869     | NR_111953    | long intergenic non-protein coding RNA 869         |
| 37 | MCOLN2        | NM_153259    | mucolipin 2                                        |
| 38 | TRA2B         | NM_004593    | transformer 2 beta homolog (Drosophila)            |
| 39 | FILIP1L       | NM_001282794 | filamin A interacting protein 1-like               |
| 40 | RBM41         | NM_001171080 | RNA binding motif protein 41                       |
| 41 | BRPF1         | NM_004634    | bromodomain and PHD finger containing 1            |
| 42 | TSEN34        | NM_001282333 | tRNA splicing endonuclease subunit 34              |
| 43 | MEF2B         | NM_001145785 | myocyte enhancer factor 2B                         |
| 44 | TOR1A         | NM_000113    | torsin family 1 member A                           |
| 45 | PPP2R4        | NM_021131    | PTPA, protein phosphatase 2A regulatory subunit 4  |
| 46 | ELOVL5        | NM_021814    | ELOVL fatty acid elongase 5                        |
| 47 | MEF2BNB-MEF2B | NR_027307    | BORCS8-MEF2B, transcript variant 2, non-coding RNA |
| 48 | TBC1D22A      | NM_001284303 | TBC1 domain family member 22A                      |
| 49 | TMEM64        | NM_001008495 | transmembrane protein 64                           |
| 50 | LSM1          | NR_045492    | LSM1 homolog, mRNA degradation associated          |
| 51 | BANF1         | NM_001143985 | barrier to autointegration factor 1                |
| 52 | MYB           | NM_005375    | MYB proto-oncogene, transcription factor           |
| 53 | IVNS1ABP      | NM_006469    | influenza virus NS1A binding protein               |
| 54 | NDUFA6        | NM_002490    | NADH:ubiquinone oxidoreductase subunit A6          |
| 55 | MRPS6         | NM_032476    | mitochondrial ribosomal protein S6                 |
| 56 | BAG1          | NM_001172415 | BCL2 associated athanogene 1                       |
| 57 | SMC1A         | NM_001281463 | structural maintenance of chromosomes 1A           |
| 58 | RFX7          | NM_022841    | regulatory factor X7                               |
| 59 | CLHC1         | NM_152385    | clathrin heavy chain linker domain containing 1    |
| 60 | DAZAP1        | NM_170711    | DAZ associated protein 1                           |
| 61 | PPP1R12C      | NM_017607    | protein phosphatase 1 regulatory subunit 12C       |
| 62 | EIF4G1        | NM_198241    | eukaryotic translation initiation factor 4 gamma 1 |
| 63 | COX7A2L       | NM_004718    | cytochrome c oxidase subunit 7A2 like              |
| 64 | MRPL21        | NM_181514    | mitochondrial ribosomal protein L21                |

|    |        |           |                         |
|----|--------|-----------|-------------------------|
| 65 | PHOX2A | NM_005169 | paired like homeobox 2a |
|----|--------|-----------|-------------------------|

---
