# Supplementary material for: Analysis of Under-Diagnosed Malignancy during Fine Needle Aspiration Cytology of Lymphadenopathies
Source: MDPI journal article supplement (doi:10.3390/ijms241512394), 2023-08-03
Supplement: s1 [file s1]

**Table S4.** Details of primers used for qRT-PCR analysis.

| Gene name |     | Primer Sequences        | Accession No.  | Product size (bp) |
|-----------|-----|-------------------------|----------------|-------------------|
| ENDOG     | (F) | CACCTCAACCAGAATGCCTGGA  | NM_004435.2    | 129               |
|           | (R) | GTAGGATTTCCCATCAGCCTCTG |                |                   |
| FOS       | (F) | TACTACCACTCACCCGCAGA    | NM_005252      | 474               |
|           | (R) | CAGGTTGGCAATCTCGGTCT    |                |                   |
| HDAC10    | (F) | TGTGTGTTCAACAACGTGGC    | NM_032019      | 367               |
|           | (R) | CTGAGTCAAATCCTGCCGAGA   |                |                   |
| HMMR      | (F) | GGCTGGGAAAAATGCAGAGGATG | NM_001142556.2 | 110               |
|           | (R) | CCTTTAGTGCTGACTTGGTCTGC |                |                   |
| PMPCB     | (F) | AGTGGACTCAGAGTAGCTTCGG  | NM_004279.3    | 121               |
|           | (R) | GCTCCAGAAAGTGTGCTGTTCC  |                |                   |
| PRKAR2B   | (F) | AACCGATTCACAAGGCGTGCCT  | NM_002736.3    | 144               |
|           | (R) | CAGCAGGATGTCTTTGCAAGCC  |                |                   |
| GAPDH     | (F) | AAGGACTCATGACCACAGTC    | NM_001289745.2 | 160               |
|           | (R) | TTCAGCTCAGGGATGACCTT    |                |                   |
