# Supplementary material for: Analysis of Under-Diagnosed Malignancy during Fine Needle Aspiration Cytology of Lymphadenopathies
Source: MDPI journal article supplement (doi:10.3390/ijms241512394), 2023-08-03
Supplement: s1 [file s1]

**Table S2.** 194 down-regulated genes.

|    | Genes        | Identifier   | Description                                                             |
|----|--------------|--------------|-------------------------------------------------------------------------|
| 1  | FOCAD        | NM_017794    | focadhesin                                                              |
| 2  | SDC1         | NM_001006946 | syndecan 1                                                              |
| 3  | BRF2         | NM_018310    | BRF2, RNA polymerase III transcription initiation factor 50 kDa subunit |
| 4  | ANKRD36BP2   | NR_015424    | ankyrin repeat domain 36B pseudogene 2                                  |
| 5  | LOC100289561 | NM_001242713 | uncharacterized LOC100289561                                            |
| 6  | GBA2         | NM_020944    | glucosylceramidase beta 2                                               |
| 7  | HSDL2        | NM_032303    | hydroxysteroid dehydrogenase like 2                                     |
| 8  | WWTR1        | NM_001168280 | WW domain containing transcription regulator 1                          |
| 9  | CASP10       | NM_001306083 | caspase 10                                                              |
| 10 | MRPL39       | NM_017446    | mitochondrial ribosomal protein L39                                     |
| 11 | MXD1         | NM_001202513 | MAX dimerization protein 1                                              |
| 12 | FGF12        | NM_021032    | fibroblast growth factor 12                                             |
| 13 | ZNF507       | NM_014910    | zinc finger protein 507                                                 |
| 14 | MYO1B        | NM_001130158 | myosin IB                                                               |
| 15 | DGCR2        | NM_001184781 | DiGeorge syndrome critical region gene 2                                |
| 16 | HID1         | NM_030630    | HID1 domain containing                                                  |
| 17 | THRA1 /BTR   | NR_131239    | uncharacterized LOC105371807                                            |
| 18 | GPATCH1      | NM_018025    | G-patch domain containing 1                                             |
| 19 | BET1         | NM_005868    | Bet1 golgi vesicular membrane trafficking protein                       |
| 20 | SRI          | NM_198901    | sorcin                                                                  |
| 21 | PTP4A3       | NM_007079    | protein tyrosine phosphatase type IVA, member 3                         |
| 22 | RPL19P12     | NR_026660    | ribosomal protein L19 pseudogene 12                                     |
| 23 | CRAT         | NM_001257363 | carnitine O-acetyltransferase                                           |
| 24 | DUSP12       | NM_007240    | dual specificity phosphatase 12                                         |
| 25 | HINT3        | NM_138571    | histidine triad nucleotide binding protein 3                            |
| 26 | ZNF407       | NM_001146189 | zinc finger protein 407                                                 |
| 27 | RBMS3        | NM_001003792 | RNA binding motif single stranded interacting protein 3                 |
| 28 | CLDND1       | NM_001040199 | claudin domain containing 1                                             |
| 29 | KEL          | NM_000420    | Kell blood group, metallo-endoropeptidase                               |
| 30 | TMEM42       | NM_144638    | transmembrane protein 42                                                |
| 31 | LHFP         | NM_005780    | lipoma HMGIC fusion partner                                             |
| 32 | HS3ST3B1     | NR_130138    | heparan sulfate-glucosamine 3-sulfotransferase 3B1                      |
| 33 | COLCA2       | NM_001271458 | colorectal cancer associated 2                                          |
| 34 | SLC16A3      | NM_001042422 | solute carrier family 16 member 3                                       |
| 35 | PIK3R3       | NM_003629    | phosphoinositide-3-kinase regulatory subunit 3                          |
| 36 | JMJD4        | NM_001161465 | jumonji domain containing 4                                             |
| 37 | GNLY         | NM_001302758 | granulysin                                                              |
| 38 | KCNG1        | NM_002237    | potassium voltage-gated channel modifier subfamily G member 1           |
| 39 | NR2F1-AS1    | NR_109825    | NR2F1 antisense RNA 1                                                   |
| 40 | PLD4         | NM_138790    | phospholipase D family member 4                                         |
| 41 | INHBA        | NM_002192    | inhibin beta A                                                          |
| 42 | ABCD4        | NR_003256    | ATP binding cassette subfamily D member 4                               |
| 43 | PFN2         | NM_002628    | profilin 2                                                              |
| 44 | LY9          | NM_002348    | lymphocyte antigen 9                                                    |
| 45 | TSPAN5       | NM_005723    | tetraspanin 5                                                           |

|    |              |              |                                                           |
|----|--------------|--------------|-----------------------------------------------------------|
| 46 | VEGFA        | NM_001171625 | vascular endothelial growth factor A                      |
| 47 | DEXI         | NM_014015    | Dexi homolog                                              |
| 48 | KISS1R       | NM_032551    | KISS1 receptor                                            |
| 49 | EXOSC7       | NM_015004    | exosome component 7                                       |
| 50 | LOC101927730 | NR_110841    | uncharacterized LOC101927730                              |
| 51 | KDM3A        | NM_018433    | lysine demethylase 3A                                     |
| 52 | NADSYN1      | NM_018161    | NAD synthetase 1                                          |
| 53 | GSTM4        | NR_024538    | glutathione S-transferase mu 4                            |
| 54 | BACE1        | NM_012104    | beta-site APP-cleaving enzyme 1                           |
| 55 | EDNRB-AS1    | NR_103853    | EDNRB antisense RNA 1                                     |
| 56 | DCAF17       | NR_028482    | DDB1 and CUL4 associated factor 17                        |
| 57 | NUP35        | NM_001287584 | nucleoporin 35kDa                                         |
| 58 | ZNRF2        | NM_147128    | zinc and ring finger 2, E3 ubiquitin protein ligase       |
| 59 | KIF16B       | NM_024704    | kinesin family member 16B                                 |
| 60 | PDHB         | NR_033384    | pyruvate dehydrogenase (lipoamide) beta                   |
| 61 | PTPRF        | NM_002840    | protein tyrosine phosphatase, receptor type F             |
| 62 | ADAM22       | NM_021721    | ADAM metallopeptidase domain 22                           |
| 63 | CDR1         | NM_004065    | cerebellar degeneration related protein 1                 |
| 64 | CAPN10       | NM_023085    | calpain 10                                                |
| 65 | RAB20        | NM_017817    | RAB20, member RAS oncogene family                         |
| 66 | LINC01530    | NR_034159    | long intergenic non-protein coding RNA 1530               |
| 67 | CADM3-AS1    | NR_037870    | CADM3 antisense RNA 1                                     |
| 68 | MARK1        | NM_018650    | microtubule affinity regulating kinase 1                  |
| 69 | WLS          | NM_001002292 | wntless Wnt ligand secretion mediator                     |
| 70 | STRADB       | NM_001206864 | STE20-related kinase adaptor beta                         |
| 71 | C1RL-AS1     | NR_026947    | C1RL antisense RNA 1                                      |
| 72 | WDR19        | NM_025132    | WD repeat domain 19                                       |
| 73 | MMEL1        | NM_033467    | membrane metallo-endopeptidase-like 1                     |
| 74 | LOC100506136 | NR_038948    | uncharacterized LOC100506136                              |
| 75 | RTKN         | NM_001015056 | rhotekin                                                  |
| 76 | F5           | NM_000130    | coagulation factor V                                      |
| 77 | ZSCAN25      | NM_145115    | zinc finger and SCAN domain containing 25                 |
| 78 | ZNF625-ZNF20 | NR_037802    | ZNF625-ZNF20 readthrough (NMD candidate)                  |
| 79 | ZNF20        | NM_021143    | zinc finger protein 20                                    |
| 80 | B3GAT1       | NM_018644    | beta-1,3-glucuronyltransferase 1                          |
| 81 | ISLR         | NM_005545    | immunoglobulin superfamily containing leucine-rich repeat |
| 82 | LRP3         | NM_002333    | LDL receptor related protein 3                            |
| 83 | ABCA3        | NM_001089    | ATP binding cassette subfamily A member 3                 |
| 84 | SNHG17       | NR_027241    | small nucleolar RNA host gene 17                          |
| 85 | XKR8         | NM_018053    | XK related 8                                              |
| 86 | PCNXL4       | NM_022495    | .                                                         |
| 87 | DPY19L1      | NM_015283    | dpy-19 like 1 (C. elegans)                                |
| 88 | TTC21B       | NM_024753    | tetratricopeptide repeat domain 21B                       |
| 89 | ATXN7L2      | NM_153340    | ataxin 7 like 2                                           |
| 90 | DUSP7        | NM_001947    | dual specificity phosphatase 7                            |
| 91 | MAB21L2      | NM_006439    | mab-21 like 2                                             |
| 92 | TRIM32       | NM_012210    | tripartite motif containing 32                            |
| 93 | LACTB        | NM_171846    | lactamase beta                                            |

|     |              |              |                                                         |
|-----|--------------|--------------|---------------------------------------------------------|
| 94  | SRGAP2D      | NR_120535_1  | SLIT-ROBO Rho GTPase activating protein 2D (pseudogene) |
| 95  | SULF1        | NM_015170    | sulfatase 1                                             |
| 96  | PNMA3        | NM_013364    | paraneoplastic Ma antigen 3                             |
| 97  | RYR3         | NM_001243996 | ryanodine receptor 3                                    |
| 98  | TOR1AIP1     | NM_015602    | torsin 1A interacting protein 1                         |
| 99  | UBTD1        | NM_024954    | ubiquitin domain containing 1                           |
| 100 | PIGY         | NM_001042616 | phosphatidylinositol glycan anchor biosynthesis class Y |
| 101 | PYURF        | NM_032906    | PIGY upstream reading frame                             |
| 102 | FERMT1       | NM_017671    | fermitin family member 1                                |
| 103 | MPPED2       | NM_001145399 | metallophosphoesterase domain containing 2              |
| 104 | LOC101928517 | NR_110732    | uncharacterized LOC101928517                            |
| 105 | NIFK-AS1     | NR_037858    | NIFK antisense RNA 1                                    |
| 106 | ZNF75D       | NR_110381    | zinc finger protein 75D                                 |
| 107 | TSPAN32      | NM_139022    | tetraspanin 32                                          |
| 108 | RAB3IL1      | NM_001271686 | RAB3A interacting protein like 1                        |
| 109 | NID1         | NM_002508    | nidogen 1                                               |
| 110 | SIGLEC5      | NM_003830    | sialic acid binding Ig like lectin 5                    |
| 111 | SLC35B4      | NM_032826    | solute carrier family 35 member B4                      |
| 112 | TMEM209      | NM_001301163 | transmembrane protein 209                               |
| 113 | LRRC19       | NM_022901    | leucine rich repeat containing 19                       |
| 114 | INO80B       | NM_031288    | INO80 complex subunit B                                 |
| 115 | NUDT18       | NM_024815    | nudix hydrolase 18                                      |
| 116 | LINC00667    | NR_015389    | long intergenic non-protein coding RNA 667              |
| 117 | MPND         | NM_001300862 | MPN domain containing                                   |
| 118 | CD40LG       | NM_000074    | CD40 ligand                                             |
| 119 | DDX43        | NM_018665    | DEAD-box helicase 43                                    |
| 120 | ZNF549       | NM_153263    | zinc finger protein 549                                 |
| 121 | ZKSCAN3      | NM_024493    | zinc finger with KRAB and SCAN domains 3                |
| 122 | HDAC4        | NM_006037    | histone deacetylase 4                                   |
| 123 | LZTFL1       | NM_001276379 | leucine zipper transcription factor like 1              |
| 124 | DHODH        | NM_001361    | dihydroorotate dehydrogenase (quinone)                  |
| 125 | SERINC5      | NR_126060    | serine incorporator 5                                   |
| 126 | TCL6         | NR_028288    | T-cell leukemia /lymphoma 6 (non-protein coding)        |
| 127 | NUDT12       | NM_001300741 | nudix hydrolase 12                                      |
| 128 | FAM210A      | NM_152352    | family with sequence similarity 210 member A            |
| 129 | MRPL54       | NM_172251    | mitochondrial ribosomal protein L54                     |
| 130 | LINC01296    | NR_122112    | long intergenic non-protein coding RNA 1296             |
| 131 | SRCAP        | NM_006662    | Snf2-related CREBBP activator protein                   |
| 132 | L1CAM        | NM_000425    | L1 cell adhesion molecule                               |
| 133 | KIF13A       | NM_001105568 | kinesin family member 13A                               |
| 134 | SMCO4        | NM_020179    | single-pass membrane protein with coiled-coil domains 4 |
| 135 | ENOSF1       | NM_001126123 | enolase superfamily member 1                            |
| 136 | CAPN11       | NM_007058    | calpain 11                                              |
| 137 | FGD1         | NM_004463    | FYVE, RhoGEF and PH domain containing 1                 |
| 138 | TVP23C-CDRT4 | NR_037924    | TVP23C-CDRT4 readthrough                                |
| 139 | MICA         | NM_001289153 | MHC class I polypeptide-related sequence A              |
| 140 | TMEM38B      | NM_018112    | transmembrane protein 38B                               |

|     |            |              |                                                         |
|-----|------------|--------------|---------------------------------------------------------|
| 141 | ITGB8      | NM_002214    | integrin subunit beta 8                                 |
| 142 | RFX2       | NM_134433    | regulatory factor X2                                    |
| 143 | GPR182     | NM_007264    | G protein-coupled receptor 182                          |
| 144 | HOXA5      | NM_019102    | homeobox A5                                             |
| 145 | GNA14      | NM_004297    | G protein subunit alpha 14                              |
| 146 | KRT72      | NM_001146225 | keratin 72                                              |
| 147 | EHD3       | NM_014600    | EH domain containing 3                                  |
| 148 | IL11       | NM_000641    | interleukin 11                                          |
| 149 | ADGRF5     | NM_001098518 | adhesion G protein-coupled receptor F5                  |
| 150 | ZNF577     | NR_024181    | zinc finger protein 577                                 |
| 151 | ZNF747     | NM_001305019 | zinc finger protein 747                                 |
| 152 | RAD54B     | NM_012415    | RAD54 homolog B ( <i>S. cerevisiae</i> )                |
| 153 | TMEM159    | NR_125971    | transmembrane protein 159                               |
| 154 | POSTN      | NM_001135936 | periostin                                               |
| 155 | COA6       | NM_001206641 | cytochrome c oxidase assembly factor 6                  |
| 156 | PARG       | NR_130169    | poly(ADP-ribose) glycohydrolase                         |
| 157 | C10orf32   | NM_144591    | .                                                       |
| 158 | COMTD1     | NM_144589    | catechol-O-methyltransferase domain containing 1        |
| 159 | MTMR2      | NM_201278    | myotubularin related protein 2                          |
| 160 | CRB2       | NM_173689    | crumbs 2, cell polarity complex component               |
| 161 | CARKD      | NM_001242883 | .                                                       |
| 162 | CHPF       | NM_001195731 | chondroitin polymerizing factor                         |
| 163 | TMEM135    | NR_033149    | transmembrane protein 135                               |
| 164 | CDH1       | NM_004360    | cadherin 1                                              |
| 165 | EXOC3L4    | NM_001077594 | exocyst complex component 3 like 4                      |
| 166 | SEZ6L2     | NM_012410    | seizure related 6 homolog like 2                        |
| 167 | BST1       | NM_004334    | bone marrow stromal cell antigen 1                      |
| 168 | MYO6       | NM_001300899 | myosin VI                                               |
| 169 | ARSB       | NM_000046    | arylsulfatase B                                         |
| 170 | ABCB1      | NM_000927    | ATP-binding cassette, sub-family B (MDR /TAP), member 1 |
| 171 | CD244      | NM_001166664 | CD244 molecule                                          |
| 172 | ADRA2A     | NM_000681    | adrenoceptor alpha 2A                                   |
| 173 | SCN9A      | NM_002977    | sodium voltage-gated channel alpha subunit 9            |
| 174 | CBR1       | NM_001757    | carbonyl reductase 1                                    |
| 175 | PDE8B      | NM_003719    | phosphodiesterase 8B                                    |
| 176 | DIAPH3     | NM_001258367 | diaphanous related formin 3                             |
| 177 | PWP2       | NM_005049    | PWP2 periodic tryptophan protein homolog (yeast)        |
| 178 | UCHL1      | NM_004181    | ubiquitin C-terminal hydrolase L1                       |
| 179 | PSD3       | NM_015310    | pleckstrin and Sec7 domain containing 3                 |
| 180 | FAM161A    | NR_037710    | family with sequence similarity 161 member A            |
| 181 | WDR91      | NM_014149    | WD repeat domain 91                                     |
| 182 | NPR2       | NM_003995    | natriuretic peptide receptor 2                          |
| 183 | PIK3CD-AS2 | NR_126366    | PIK3CD antisense RNA 2                                  |
| 184 | ITGAV      | NM_001145000 | integrin subunit alpha V                                |
| 185 | CELSR2     | NM_001408    | cadherin EGF LAG seven-pass G-type receptor 2           |
| 186 | RBAK       | NM_001204456 | RB associated KRAB zinc finger                          |
| 187 | MRPL55     | NM_181462    | mitochondrial ribosomal protein L55                     |
| 188 | MFAP3      | NM_005927    | microfibrillar associated protein 3                     |
| 189 | LRR1       | NM_152329    | leucine rich repeat protein 1                           |

|     |              |           |                              |
|-----|--------------|-----------|------------------------------|
| 190 | TSPAN7       | NM_004615 | tetraspanin 7                |
| 191 | MOAP1        | NM_022151 | modulator of apoptosis 1     |
| 192 | FRMD4B       | NM_015123 | FERM domain containing 4B    |
| 193 | LOC100128288 | NR_024447 | uncharacterized LOC100128288 |
| 194 | SOX18        | NM_018419 | SRY-box 18                   |

---
